# Supplementary material for: Chikungunya virus infection in Indonesia: a systematic review and evolutionary analysis
Source: PubMed Central journal article supplement (PMC6417237; doi:10.1186/s12879-019-3857-y), 2019-03-12
Supplement: 12879_2019_3857_MOESM1_ESM.pdf [file 12879_2019_3857_MOESM1_ESM.pdf]

**Additional file 2 - Individual characteristics and risk bias assessment of included studies in the systematic review**

Table A. Individual characteristics of included studies on incidence of chikungunya in Indonesia

| Study                  | Setting         | Presentation | Outbreak | Year      | Regions                  | Design      | Sex ratio (M/F) | Age range   | Chikungunya diagnosis        | Number of cohort | Incidence rate        | Risk of bias |          |         |               | Precision | Reference |
|------------------------|-----------------|--------------|----------|-----------|--------------------------|-------------|-----------------|-------------|------------------------------|------------------|-----------------------|--------------|----------|---------|---------------|-----------|-----------|
|                        |                 |              |          |           |                          |             |                 |             |                              |                  |                       | Assay        | Sampling | Setting | Response rate |           |           |
| Kosasih <i>et al.</i>  | Community-based | Febrile      | No       | 2000-2004 | Bandung                  | Prospective | 1.85: 1         | 18-66 years | RT-PCR, viral isolation, IgM | 5,704            | 10.1/100 persons-year | Low          | NA       | Low     | Unknown       | High      | [1]       |
| Capeding <i>et al.</i> | Community-based | Febrile      | No       | 2010 2011 | Jakarta, West Java, Bali | Prospective | Unknown         | 2-14 years  | NS1 positive                 | 446              | 8.8 /100 person-years | Low          | NA       | Low     | Unknown       | High      | [2]       |

Table B. Individual characteristics of included studies on seroprevalence of anti-CHIKV IgM antibodies in Indonesia

| Study                  | Setting         | Presentation | Outbreak | Year      | Region                   | Design          | Subject                           | Sample tested | Positive cases |      | Diagnosis method | Risk of bias |          |         |               | Precision | Reference |
|------------------------|-----------------|--------------|----------|-----------|--------------------------|-----------------|-----------------------------------|---------------|----------------|------|------------------|--------------|----------|---------|---------------|-----------|-----------|
|                        |                 |              |          |           |                          |                 |                                   |               | Number         | %    |                  | Assay        | Sampling | Setting | Response rate |           |           |
| Sari <i>et al.</i>     | Hospital-based  | Febrile      | Yes      | 2015-2016 | Bali                     | Cross-sectional | Chikungunya suspect patients      | 15            | 2              | 13.3 | IgM ELISA        | Low          | NA       | Low     | Unknown       | Low       | [3]       |
| Ngwe <i>et al.</i>     | Hospital-based  | Febrile      | No       | 2004-2005 | Indonesia                | Cross-sectional | Dengue suspect patients           | 198           | 7              | 3.5  | IgM ELISA        | Low          | NA       | Low     | Unknown       | High      | [4]       |
| Capeding <i>et al.</i> | Community-based | Febrile      | No       | 2010      | Jakarta, West Java, Bali | Prospective     | Febrile episodes                  | 105           | 26             | 24.8 | IgM ELISA        | Low          | NA       | Low     | Unknown       | High      | [2]       |
| Laras <i>et al.</i>    | Community-based | Febrile      | Yes      | 2002      | Bekasi                   | Cross-sectional | Chikungunya suspect patients      | 93            | 40             | 43.0 | IgM ELISA        | Low          | NA       | Low     | Unknown       | Low       | [5]       |
| Laras <i>et al.</i>    | Community-based | Non-febrile  | Yes      | 2002      | Bekasi                   | Cross-sectional | Healthy individuals               | 124           | 13             | 10.4 | IgM ELISA        | Low          | Low      | Low     | Unknown       | High      | [5]       |
| Laras <i>et al.</i>    | Community-based | Non-febrile  | Yes      | 2002      | Bekasi                   | Cross-sectional | Healthy individuals               | 21            | 4              | 19.0 | IgM ELISA        | Low          | Low      | Low     | Unknown       | Low       | [5]       |
| Laras <i>et al.</i>    | Community-based | Non-febrile  | No       | 2002      | Bekasi                   | Cross-sectional | Healthy individuals               | 55            | 0              | 0.0  | IgM ELISA        | Low          | Low      | Low     | Unknown       | Low       | [5]       |
| Laras <i>et al.</i>    | Community-based | Febrile      | Yes      | 2001      | Bogor                    | Cross-sectional | Chikungunya suspect patients      | 86            | 52             | 60.4 | IgM ELISA        | Low          | NA       | Low     | Unknown       | Low       | [5]       |
| Laras <i>et al.</i>    | Community-based | Non-febrile  | Yes      | 2001      | Bogor                    | Cross-sectional | Healthy individuals               | 45            | 8              | 48.0 | IgM ELISA        | Low          | Low      | Low     | Unknown       | Low       | [5]       |
| Laras <i>et al.</i>    | Community-based | Non-febrile  | Yes      | 2001      | Bogor                    | Cross-sectional | Healthy individuals               | 25            | 12             | 48.0 | IgM ELISA        | Low          | Low      | Low     | Unknown       | Low       | [5]       |
| Laras <i>et al.</i>    | Community-based | Non-febrile  | No       | 2001      | Bogor                    | Cross-sectional | Healthy individuals               | 99            | 9              | 9.1  | IgM ELISA        | Low          | Low      | Low     | Unknown       | Low       | [5]       |
| Porter <i>et al.</i>   | Community-based | Febrile      | Yes      | 1998-1999 | Yogyakarta               | Cross-sectional | Were chikungunya suspect patients | 61            | 2              | 3.2  | IgM ELISA        | Low          | NA       | Low     | Unknown       | Low       | [6]       |
| Porter <i>et al.</i>   | Community-based | Non-febrile  | Yes      | 1998-1999 | Yogyakarta               | Cross-sectional | Healthy individuals               | 76            | 3              | 3.9  | IgM ELISA        | Low          | Unknown  | Low     | Unknown       | Low       | [6]       |
| Porter <i>et al.</i>   | Community-based | Febrile      | No       | 1998-1999 | Yogyakarta               | Cross-sectional | Healthy individuals               | 57            | 15             | 26.3 | IgM ELISA        | Low          | Unknown  | Low     | Unknown       | Low       | [6]       |
| Porter <i>et al.</i>   | Community-based | Non-febrile  | No       | 1998-1999 | Yogyakarta               | Cross-sectional | Healthy individuals               | 123           | 7              | 5.6  | IgM ELISA        | Low          | Unknown  | Low     | Unknown       | High      | [6]       |

Table C. Individual characteristics of included studies on seroprevalence of anti-CHIKV IgG antibodies in Indonesia

| Study                   | Setting         | Presentation | Outbreak | Year                   | Region         | Design          | Subject                           | Sample tested | Positive cases |      | Diagnosis method | Risk of bias |          |         |               | Precision | Reference |
|-------------------------|-----------------|--------------|----------|------------------------|----------------|-----------------|-----------------------------------|---------------|----------------|------|------------------|--------------|----------|---------|---------------|-----------|-----------|
|                         |                 |              |          |                        |                |                 |                                   |               | Number         | %    |                  | Assay        | Sampling | Setting | Response rate |           |           |
| Sari <i>et al.</i>      | Hospital based  | Febrile      | Yes      | 2015                   | Bali           | Cross-sectional | Chikungunya suspect patients      | 8             | 0              | 0.0  | IgG              | Low          | NA       | Low     | Unknown       | Low       | [3]       |
| Ngwe <i>et al.</i>      | Hospital-based  | Febrile      | No       | 2004-2005 <sup>a</sup> | Indonesia      | Cross-sectional | Dengue suspect patients           | 198           | 87             | 43.9 | IgG              | Low          | NA       | Low     | Unknown       | High      | [4]       |
| Suharti <i>et al.</i>   | Hospital-based  | Febrile      | No       | 1995-1996              | Semarang       | Cross-sectional | Dengue suspect patients           | 60            | 14             | 23.3 | IgG              | Low          | NA       | Low     | Unknown       | Low       | [7]       |
| Porter <i>et al.</i>    | Community-based | Febrile      | Yes      | 1998-1999              | Yogyakarta     | Cross-sectional | Were chikungunya suspect patients | 61            | 43             | 70.4 | IgG              | Low          | NA       | Low     | Unknown       | Low       | [6]       |
| Porter <i>et al.</i>    | Community-based | Non-febrile  | Yes      | 1998-1999              | Yogyakarta     | Cross-sectional | Healthy individuals               | 76            | 34             | 44.5 | IgG              | Low          | Unknown  | Low     | Unknown       | Low       | [6]       |
| Porter <i>et al.</i>    | Community-based | Febrile      | No       | 1998-1999              | Yogyakarta     | Cross-sectional | Were chikungunya suspect patients | 57            | 24             | 42.1 | IgG              | Low          | NA       | Low     | Unknown       | Low       | [6]       |
| Porter <i>et al.</i>    | Community-based | Non-febrile  | No       | 1998-1999              | Yogyakarta     | Cross-sectional | Healthy individuals               | 123           | 33             | 26.8 | IgG              | Low          | Unknown  | Low     | Unknown       | High      | [6]       |
| Laras <i>et al.</i>     | Community-based | Febrile      | Yes      | 2002                   | Bekasi         | Cross-sectional | Chikungunya suspect patients      | 93            | 68             | 73.1 | IgG              | Low          | NA       | Low     | Unknown       | Low       | [5]       |
| Laras <i>et al.</i>     | Community-based | Non-febrile  | Yes      | 2002                   | Bekasi         | Cross-sectional | Healthy individuals               | 145           | 65             | 44.8 | IgG              | Low          | Low      | Low     | Unknown       | High      | [5]       |
| Laras <i>et al.</i>     | Community-based | Non-febrile  | No       | 2002                   | Bekasi         | Cross-sectional | Healthy individuals               | 55            | 3              | 5.4  | IgG              | Low          | Low      | Low     | Unknown       | Low       | [5]       |
| Laras <i>et al.</i>     | Community-based | Febrile      | Yes      | 2001                   | Bogor          | Cross-sectional | Chikungunya suspect patients      | 86            | 58             | 67.4 | IgG              | Low          | NA       | Low     | Unknown       | Low       | [5]       |
| Laras <i>et al.</i>     | Community-based | Non-febrile  | Yes      | 2001                   | Bogor          | Cross-sectional | Healthy individuals               | 70            | 35             | 50.0 | IgG              | Low          | Low      | Low     | Unknown       | Low       | [5]       |
| Laras <i>et al.</i>     | Community-based | Non-febrile  | No       | 2001                   | Bogor          | Cross-sectional | Healthy individuals               | 99            | 13             | 13.1 | IgG              | Low          | Low      | Low     | Unknown       | Low       | [5]       |
| Laras <i>et al.</i>     | Unknown         | Febrile      | Yes      | 2002-2003 <sup>b</sup> | North Sulawesi | Unknown         | Chikungunya suspect patients      | 222           | 18             | 8.1  | IgG              | Low          | NA       | Low     | Unknown       | High      | [5]       |
| Kanamitsu <i>et al.</i> | Unknown         | Non-febrile  | No       | 1972                   | Kalimantan     | Cross-sectional | Healthy individuals               | 692           | 151            | 21.8 | HI               | Low          | Unknown  | Low     | Unknown       | High      | [8]       |
| Kanamitsu <i>et al.</i> | Unknown         | Non-febrile  | No       | 1972                   | Java           | Cross-sectional | Healthy individuals               | 54            | 0              | 0.0  | HI               | Low          | Unknown  | Low     | Unknown       | Low       | [8]       |
| Kanamitsu <i>et al.</i> | Unknown         | Non-febrile  | No       | 1972                   | Bali           | Cross-sectional | Healthy individuals               | 107           | 2              | 1.9  | HI               | Low          | Unknown  | Low     | Unknown       | High      | [8]       |
| Kanamitsu <i>et al.</i> | Unknown         | Non-febrile  | No       | 1972                   | Lombok         | Cross-sectional | Healthy individuals               | 140           | 6              | 4.3  | HI               | Low          | Unknown  | Low     | Unknown       | High      | [8]       |

---

|                         |         |             |    |           |            |                 |                     |     |    |      |      |     |         |     |         |      |     |
|-------------------------|---------|-------------|----|-----------|------------|-----------------|---------------------|-----|----|------|------|-----|---------|-----|---------|------|-----|
| Kanamitsu <i>et al.</i> | Unknown | Non-febrile | No | 1972      | Kupang     | Cross-sectional | Healthy individuals | 121 | 15 | 12.4 | HI   | Low | Unknown | Low | Unknown | High | [8] |
| Kanamitsu <i>et al.</i> | Unknown | Non-febrile | No | 1972      | Sulawesi   | Cross-sectional | Healthy individuals | 298 | 55 | 18.4 | HI   | Low | Unknown | Low | Unknown | High | [8] |
| Kanamitsu <i>et al.</i> | Unknown | Non-febrile | No | 1972      | Ambon      | Cross-sectional | Healthy individuals | 321 | 37 | 11.5 | HI   | Low | Unknown | Low | Unknown | High | [8] |
| Tesh <i>et al.</i>      | Unknown | Non-febrile | No | 1972      | Kalimantan | Cross-sectional | Unknown             | 199 | 28 | 14.1 | PRNT | Low | Unknown | Low | Unknown | High | [9] |
| Tesh <i>et al.</i>      | Unknown | Non-febrile | No | 1971      | Sulawesi   | Cross-sectional | Unknown             | 125 | 24 | 19.2 | PRNT | Low | Unknown | Low | Unknown | High | [9] |
| Tesh <i>et al.</i>      | Unknown | Non-febrile | No | 1971      | Ambon      | Cross-sectional | Unknown             | 64  | 2  | 3.1  | PRNT | Low | Unknown | Low | Unknown | Low  | [9] |
| Tesh <i>et al.</i>      | Unknown | Non-febrile | No | 1969-1970 | Papua      | Cross-sectional | Unknown             | 243 | 45 | 18.5 | PRNT | Low | Unknown | Low | Unknown | High | [9] |

---

Table D. Individual characteristics of included studies on Chikungunya virus genotypes circulating in Indonesia

| Study                     | Presentation | Outbreak | Year      | Location                                       | Design                     | Setting         | Cases                       | Diagnosis                      | Sample             | Origin           | Number of sequences | Genotype(s)          | Accession number (GenBank)              | Risk of bias |                 | Reference |
|---------------------------|--------------|----------|-----------|------------------------------------------------|----------------------------|-----------------|-----------------------------|--------------------------------|--------------------|------------------|---------------------|----------------------|-----------------------------------------|--------------|-----------------|-----------|
|                           |              |          |           |                                                |                            |                 |                             |                                |                    |                  |                     |                      |                                         | Isolate      | Location & Date |           |
| Sasmono <i>et al.</i>     | Febrile      | No       | 2015      | Jambi                                          | Cross-sectional            | Local cases     | DEN-like illness            | alphavirus-specific PCR        | 103 tested         | Human            | 8                   | Asian                | KX097981-KX097988                       | Low          | Low             | [10]      |
| Sari <i>et al.</i>        | Febrile      | Yes      | 2016      | Bali                                           | Cross-sectional            | Local cases     | Acute febrile               | PCR or CHIKV-specific IgM      | 15 tested          | Human            | 6                   | Asian                | KY885022-KY885027                       | Low          | Low             | [3]       |
| Yang <i>et al.</i>        | Febrile      | Unknown  | 2007-2014 | Indonesia                                      | Cross-sectional            | Exported case   | CF and DF suspected cases   | RT-PCR, IgM and IgG, Isolation | Unknown            | Human            | 29                  | ECSA (6), Asian (23) | KU561427-KU561432 and KU561436-KU561458 | Low          | Low             | [11]      |
| Riswari <i>et al.</i>     | Febrile      | No       | 2007      | Bandung                                        | retrospective cohort study | Local cases     | Non-DENV acute febrile      | RT-PCR, isolation, IgM         | 5                  | Human            | 3                   | Asian                | KT175539-KT175541                       | Low          | Low             | [12]      |
| Wolfel <i>et al.</i>      | Febrile      | Unknown  | 2012      | Bali                                           | Cross-sectional            | Exported case   | Chikungunya fever case      | Unknown                        | 1                  | Human            | 1                   | Asian                | KM673291                                | Low          | Low             | [13]      |
| Maha <i>et al.</i>        | Febrile      | Yes      | 2011      | Mataram, Jembrana, Tangerang, Ngawi, Kubu Raya | Cross-sectional            | Local cases     | Chikungunya-suspect case    | PCR (RT-PCR)                   | 109 tested         | Human            | 28                  | ECSA (2), Asian (26) | KJ729829-KJ729856                       | Low          | Low             | [14]      |
| Shchelkanov <i>et al.</i> | Febrile      | Unknown  | 2013      | Indonesia                                      | Cross-sectional            | Exported case   | Chikungunya fever case      | Unknown                        | 1                  | Human            | 1                   | Asian                | KF872195                                | Low          | Low             | [15]      |
| Scholte <i>et al.</i>     | Febrile      | Unknown  | 2010      | Indonesia                                      | Cross-sectional            | Exported case   | Chikungunya-suspect case    | Unknown                        | 1                  | Human            | 1                   | ECSA                 | KC862329                                | Low          | Low             | [16]      |
| Kosasih <i>et al.</i>     | Febrile      | No       | 2000-2008 | Bandung                                        | prospective                | Local cases     | Non-dengue febrile illness  | IgM, IgG, RT-PCR, isolation    | 47 positive RT-PCR | Human            | 20                  | Asian                | KC879559-KC879578                       | Low          | Low             | [1]       |
| Mulyatno <i>et al.</i>    | NA           | No       | 2011      | Surabaya                                       | Cross-sectional            | Local mosquitos | NA                          | Culture and RT-PCR             | 29 pools           | Ae. aegypti male | 2                   | Asian                | AB678689-AB678690                       | Low          | Low             | [17]      |
| Mulyatno <i>et al.</i>    | Febrile      | No       | 2010-2011 | Surabaya                                       | Cross-sectional            | Local cases     | DF or CHIKF diagnosed cases | Culture and RT-PCR             | 773 cultured       | Human            | 17                  | Asian                | AB678691-AB678695<br>AB678678-AB678688  | Low          | Low             | [17]      |

| Study                   | Presentation | Outbreak | Year      | Location  | Design          | Setting       | Cases                     | Diagnosis             | Sample  | Origin | Number of sequences | Genotype(s)         | Accession number (GenBank)  | Risk of bias |                 | Reference |
|-------------------------|--------------|----------|-----------|-----------|-----------------|---------------|---------------------------|-----------------------|---------|--------|---------------------|---------------------|-----------------------------|--------------|-----------------|-----------|
|                         |              |          |           |           |                 |               |                           |                       |         |        |                     |                     |                             | Isolate      | Location & Date |           |
| Grandadam <i>et al.</i> | Unknown      | Unknown  | 2009      | Indonesia | Cross-sectional | Exported case | Unknown                   | Unknown               | Unknown | Human  | 1                   | Asian               | FR846307                    | Low          | Low             | [18]      |
| Volk <i>et al.</i>      | Unknown      | Unknown  | 1983      | Indonesia | Unknown         | Unknown       | Unknown                   | Unknown               | Unknown | Human  | 1                   | Asian               | HM045791                    | Low          | Low             | [19]      |
| Volk <i>et al.</i>      | Unknown      | Unknown  | 1985      | Indonesia | Unknown         | Unknown       | Unknown                   | Unknown               | Unknown | Human  | 1                   | Asian               | HM045797                    | Low          | Low             | [19]      |
| Ng <i>et al.</i>        | Febrile      | Unknown  | 2008      | Indonesia | Cross-sectional | Exported case | Suggestive of CHIKF cases | RT-PCR and IgM        | Unknown | Human  | 2                   | ECSA (1), Asian (1) | FJ445483, FJ445472          | Low          | Low             | [20]      |
| Huang <i>et al.</i>     | Febrile      | Unknown  | 2007-2008 | Indonesia | Cross-sectional | Exported case | Fever cases               | RT-PCR                | Unknown | Human  | 7                   | Asian               | FJ807897, FJ807886-FJ807891 | Low          | Low             | [21]      |
| Shu <i>et al.</i>       | Febrile      | Unknown  | 2007      | Indonesia | Cross-sectional | Exported case | Fever cases               | RT-PCR, IgM, IgG, IgA | Unknown | Human  | 1                   | Asian               | EU192143                    | Low          | Low             | [22]      |
| Powers <i>et al.</i>    | Unknown      | Unknown  | 1985      | Ambon     | Unknown         | Local cases   | Unknown                   | Unknown               | Unknown | Human  | 1                   | Asian               | AF192894                    | Low          | Low             | [23]      |

Table E. Individual characteristics of included studies on exported chikungunya cases originating from Indonesia

| Study                          | Presentation | Year(s)   | Country of reporting | Design          | Setting                                | Sample tested | Number of confirmed cases | Diagnosis method                 | Genotype (n)                             | Risk bias      |                  | Reference |
|--------------------------------|--------------|-----------|----------------------|-----------------|----------------------------------------|---------------|---------------------------|----------------------------------|------------------------------------------|----------------|------------------|-----------|
|                                |              |           |                      |                 |                                        |               |                           |                                  |                                          | Travel history | Diagnosis method |           |
| Knope <i>et al.</i>            | Febrile      | 2013-2014 | Australia            | Cross-sectional | Passive surveillance system            | Unknown       | 47                        | IgM, IgG, RT-PCR and isolation   | NA                                       | Low            | Low              | [24]      |
| Yang <i>et al.</i>             | Febrile      | 2012-2014 | Taiwan               | Cross-sectional | Active and passive surveillance system | Unknown       | 23                        | RT-PCR, isolation and sequencing | Asian (15) and unidentified (8)          | Low            | Low              | [11]      |
| Knope <i>et al.</i>            | Febrile      | 2012-2013 | Australia            | Cross-sectional | Passive surveillance system            | Unknown       | 34                        | IgM, IgG, RT-PCR and isolation   | NA                                       | Low            | Low              | [25]      |
| Yang <i>et al.</i>             | Febrile      | 2009-2010 | Taiwan               | Cross-sectional | Active and passive surveillance system | Unknown       | 16                        | RT-PCR, isolation and sequencing | Asian (8), ECSA (6) and unidentified (2) | Low            | Low              | [11]      |
| Wolfel <i>et al.</i>           | Febrile      | 2012      | Germany              | Cross-sectional | Case-study                             | 1             | 1                         | Isolation and sequencing         | Asian (1)                                | Low            | Low              | [13]      |
| Knope <i>et al.</i>            | Febrile      | 2011-2012 | Australia            | Cross-sectional | Passive surveillance system            | Unknown       | 2                         | IgM, IgG, RT-PCR and isolation   | NA                                       | Low            | Low              | [26]      |
| Shchelkanov <i>et al.</i>      | Febrile      | 2013      | Russia               | Cross-sectional | Case-study                             | 1             | 1                         | RT-PCR, isolation and sequencing | Asian (1)                                | Low            | Low              | [15]      |
| Roth <i>et al.</i>             | Unknown      | 2013      | New Caledonia        | Unknown         | Unknown                                | Unknown       | 1                         | RT-PCR and sequencing            | Asian (1)                                | Low            | Low              | [27]      |
| Knope <i>et al.</i>            | Febrile      | 2010-2011 | Australia            | Cross-sectional | Passive surveillance system            | Unknown       | 32                        | IgM, IgG, RT-PCR and isolation   | NA                                       | Low            | Low              | [28]      |
| Cha <i>et al.</i>              | Febrile      | 2009-2010 | South Korea          | Cross-sectional | A part of dengue surveillance          | Unknown       | 3                         | IgM                              | NA                                       | Low            | Low              | [29]      |
| Scholte <i>et al.</i>          | Febrile      | 2010      | Netherlands          | Cross-sectional | Unknown                                | 1             | 1                         | Isolation and sequencing         | ECSA (1)                                 | Low            | Low              | [16]      |
| Dupont-Rouzeyrol <i>et al.</i> | Febrile      | 2011      | New Caledonia        | Unknown         | Unknown                                | Unknown       | 2                         | Serology                         | NA                                       | High           | Low              | [30]      |
| Chaves <i>et al.</i>           | Febrile      | 2010      | Brazil               | Cross-sectional | Case-study                             | 1             | 1                         | IgM, IgG                         | NA                                       | Low            | Low              | [31]      |
| Albuquerque <i>et al.</i>      | Febrile      | 2010      | Brazil               | Cross-sectional | Case-study                             | 1             | 1                         | IgM and HI test                  | NA                                       | Low            | Low              | [32]      |
| Wright <i>et al.</i>           | Febrile      | 2009-2010 | Australia            | Cross-sectional | Passive surveillance system            | Unknown       | 7                         | IgM, IgG, RT-PCR and isolation   | NA                                       | Low            | Low              | [33]      |
| Mizuno <i>et al.</i>           | Febrile      | 2009      | Japan                | Cross-sectional | Case-study                             | 3             | 3                         | IgM and PRNT                     | NA                                       | Low            | Low              | [34]      |
| Grandadam <i>et al.</i>        | Febrile      | 2009      | France               | Cross-sectional | Unknown                                | 1             | 1                         | IgM, RT-PCT and sequencing       | Asian (1)                                | Low            | Low              | [18]      |

| Study                     | Presentation | Year(s)   | Country of reporting | Design          | Setting                     | Sample tested | Number of confirmed cases | Diagnosis method                 | Genotype (n)        | Risk bias      |                  | Reference |
|---------------------------|--------------|-----------|----------------------|-----------------|-----------------------------|---------------|---------------------------|----------------------------------|---------------------|----------------|------------------|-----------|
|                           |              |           |                      |                 |                             |               |                           |                                  |                     | Travel history | Diagnosis method |           |
| Kobashi <i>et al.</i>     | Febrile      | 2010      | Japan                | Cross-sectional | Case-study                  | 1             | 1                         | IgM and RT-PCR                   | NA                  | Low            | Low              | [35]      |
| Fitzsimmons <i>et al.</i> | Febrile      | 2008-2009 | Australia            | Cross-sectional | Passive surveillance system | Unknown       | 2                         | IgM, IgG, RT-PCR and isolation   | NA                  | Low            | Low              | [36]      |
| Huang <i>et al.</i>       | Febrile      | 2006-2009 | Taiwan               | Cross-sectional | Active surveillance system  | Unknown       | 7                         | RT-PCR, isolation and sequencing | Asian (7)           | Low            | Low              | [21]      |
| Ng <i>et al.</i>          | Febrile      | 2009      | Singapore            | Cross-sectional | Active surveillance         | Unknown       | 3                         | IgM, RT-PCR and sequencing       | Asian (1), ECSA (1) | Low            | Low              | [20]      |
| Fitzsimmons <i>et al.</i> | Febrile      | 2007      | Australia            | Cross-sectional | Passive surveillance system | Unknown       | 3                         | IgM, IgG and RT-PCR              | NA                  | Low            | Low              | [37]      |
| Shu <i>et al.</i>         | Febrile      | 2007      | Taiwan               | Cross-sectional | Active surveillance system  | Unknown       | 1                         | RT-PCR, isolation and sequencing | Asian (1)           | Low            | Low              | [22]      |
| Panning <i>et al.</i>     | Febrile      | 2006      | Europe               | Cross-sectional | Passive surveillance system | Unknown       | 1                         | IgM, IgG or RT-PCR               | NA                  | Low            | Low              | [38]      |
| Harnett and Bucens        | Febrile      | 1989      | Australia            | Cross-sectional | Case-study                  | 1             | 1                         | IgM, IgG and isolation           | NA                  | Low            | Low              | [39]      |



## Reference

1. Kosasih H, de Mast Q, Widjaja S, Sudjana P, Antonjaya U, Ma'roef C, Riswari SF, Porter KR, Burgess TH, Alisjahbana B *et al*: Evidence for endemic chikungunya virus infections in Bandung, Indonesia. *PLoS neglected tropical diseases* 2013, 7(10):e2483.
2. Capeding MR, Chua MN, Hadinegoro SR, Hussain, II, Nallusamy R, Pitisuttithum P, Rusmil K, Thisyakorn U, Thomas SJ, Huu Tran N *et al*: Dengue and other common causes of acute febrile illness in Asia: an active surveillance study in children. *PLoS neglected tropical diseases* 2013, 7(7):e2331.
3. Sari K, Myint K, Andayani A, Adi P, Dhenni R, Perkasa D, Maroef C, Witaria N, Megawati D, Powers A *et al*: Chikungunya fever outbreak identified in North Bali, Indonesia. *Trans R Soc Trop Med Hyg* 2017, [In press].
4. Ngwe T, Inoue S, Thant KZ, Talemaitoga N, Aryati A, Dimaano EM, Matias RR, Buerano CC, Natividad FF, Abeyewickreme W *et al*: Retrospective seroepidemiological study of chikungunya infection in South Asia, Southeast Asia and the Pacific region. *Epidemiology and infection* 2016, 144(11):2268-2275.
5. Laras K, Sukri NC, Larasati RP, Bangs MJ, Kosim R, Djauzi, Wandra T, Master J, Kosasih H, Hartati S *et al*: Tracking the re-emergence of epidemic chikungunya virus in Indonesia. *Trans R Soc Trop Med Hyg* 2005, 99(2):128-141.
6. Porter KR, Tan R, Istarly Y, Suharyono W, Sutaryo, Widjaja S, Ma'Roef C, Listiyaningsih E, Kosasih H, Hueston L *et al*: A serological study of Chikungunya virus transmission in Yogyakarta, Indonesia: evidence for the first outbreak since 1982. *The Southeast Asian journal of tropical medicine and public health* 2004, 35(2):408-415.
7. Suharti C, van Gorp EC, Dolmans WM, Groen J, Hadisaputro S, Djokomoeljanto RJ, D MEO, van der Meer JW: Hanta virus infection during dengue virus infection outbreak in Indonesia. *Acta medica Indonesiana* 2009, 41(2):75-80.
8. Kanamitsu M, Taniguchi K, Urasawa S, Ogata T, Wada Y, Saroso JS: Geographic distribution of arbovirus antibodies in indigenous human populations in the Indo-Australian archipelago. *The American journal of tropical medicine and hygiene* 1979, 28(2):351-363.
9. Tesh RB, Gajdusek DC, Garruto RM, Cross JH, Rosen L: The distribution and prevalence of group A arbovirus neutralizing antibodies among human populations in Southeast Asia and the Pacific islands. *The American journal of tropical medicine and hygiene* 1975, 24(4):664-675.
10. Sasmono R, Perkasa A, Yohan B, Haryanto S, Yudhaputri FA, Hayati R, Maaroef C, Ledermann J, Myint K, Powers A: Chikungunya detection during dengue outbreak in Sumatera, Indonesia: Clinical manifestation and virological profile. *The American journal of tropical medicine and hygiene* 2017, 97(5):1393-1398.
11. Yang CF, Su CL, Hsu TC, Chang SF, Lin CC, Huang JC, Shu PY: Imported chikungunya virus strains, Taiwan, 2006-2014. *Emerging infectious diseases* 2016, 22(11):1981-1984.
12. Riswari SF, Ma'roef CN, Djauhari H, Kosasih H, Perkasa A, Yudhaputri FA, Artika IM, Williams M, van der Ven A, Myint KS *et al*: Study of viremic profile in febrile specimens of chikungunya in Bandung, Indonesia. *Journal of clinical virology : the official publication of the Pan American Society for Clinical Virology* 2016, 74:61-65.
13. Wolfel S, Vollmar P, Poluda D, Zange S, Antwerpen MH, Loscher T, Dobler G: Complete genome sequence of a chikungunya virus imported from Bali to Germany. *Genome announcements* 2015, 3(2):e00164-00115.
14. Maha MS, Susilarini NK, Hariastuti NI: Chikungunya virus mutation, Indonesia, 2011. *Emerging infectious diseases* 2015, 21(2):379-381.
15. Shchelkanov M, L'Vov D K, Kolobukhina LV, Al'khovskii SV, Shchetinin AM, Saifullin MA, Kruzhkova IS, Aristova VA, Morozova TV, Samokhvalov EI *et al*: [Isolation of the Chikungunya virus in Moscow from the Indonesian visitor (September, 2013)]. *Voprosy virusologii* 2014, 59(3):28-34.
16. Scholte FE, Tas A, Martina BE, Cordioli P, Narayanan K, Makino S, Snijder EJ, van Hemert MJ: Characterization of synthetic Chikungunya viruses based on the consensus sequence of recent E1-226V isolates. *Plos One* 2013, 8(8):e71047.
17. Mulyatno KC, Susilowati H, Yamanaka A, Soegijanto S, Konishi E: Primary isolation and phylogenetic studies of Chikungunya virus from Surabaya, Indonesia. *Japanese journal of infectious diseases* 2012, 65(1):92-94.
18. Grandadam M, Caro V, Plumet S, Thiberge JM, Souares Y, Failloux AB, Tolou HJ, Budelot M, Cosserat D, Leparc-Goffart I *et al*: Chikungunya virus, southeastern France. *Emerging infectious diseases* 2011, 17(5):910-913.
19. Volk SM, Chen R, Tsetsarkin KA, Adams AP, Garcia TI, Sall AA, Nasar F, Schuh AJ, Holmes EC, Higgs S *et al*: Genome-scale phylogenetic analyses of chikungunya virus reveal independent emergences of recent epidemics and various evolutionary rates. *Journal of virology* 2010, 84(13):6497-6504.
20. Ng LC, Tan LK, Tan CH, Tan SS, Hapuarachchi HC, Pok KY, Lai YL, Lam-Phua SG, Bucht G, Lin RT *et al*: Entomologic and virologic investigation of chikungunya, Singapore. *Emerging infectious diseases* 2009, 15(8):1243-1249.
21. Huang JH, Yang CF, Su CL, Chang SF, Cheng CH, Yu SK, Lin CC, Shu PY: Imported chikungunya virus strains, Taiwan, 2006-2009. *Emerging infectious diseases* 2009, 15(11):1854-1856.
22. Shu PY, Yang CF, Su CL, Chen CY, Chang SF, Tsai KH, Cheng CH, Huang JH: Two imported chikungunya cases, Taiwan. *Emerging infectious diseases* 2008, 14(8):1326-1327.
23. Powers AM, Brault AC, Tesh RB, Weaver SC: Re-emergence of Chikungunya and O'nyong-nyong viruses: evidence for distinct geographical lineages and distant evolutionary relationships. *The Journal of general virology* 2000, 81(Pt 2):471-479.
24. Knope KE, Muller M, Kurucz N, Doggett SL, Feldman R, Johansen CA, Hobby M, Bennett S, Lynch S, Sly A *et al*: Arboviral diseases and malaria in Australia, 2013-14: Annual report of the National Arbovirus and Malaria Advisory Committee. *Commun Dis Intell Q Rep* 2016, 40(3):E400-E436.
25. Knope KE, Kurucz N, Doggett SL, Muller M, Johansen CA, Feldman R, Hobby M, Bennett S, Sly A, Lynch S *et al*: Arboviral diseases and malaria in Australia, 2012-13: Annual report of the National Arbovirus and Malaria Advisory Committee. *Commun Dis Intell Q Rep* 2016, 40(1):E17-47.

26. Knope KE, Doggett SL, Kurucz N, Johansen CA, Nicholson J, Feldman R, Sly A, Hobby M, El Saadi D, Muller M *et al*: Arboviral diseases and malaria in Australia, 2011-12: Annual report of the National Arbovirus and Malaria Advisory Committee. *Commun Dis Intell Q Rep* 2014, 38(2):E122-142.
27. Roth A, Hoy D, Horwood PF, Ropa B, Hancock T, Guillaumot L, Rickart K, Frison P, Pavlin B, Souares Y: Preparedness for threat of chikungunya in the pacific. *Emerging infectious diseases* 2014, 20(8).
28. Knope K, Whelan P, Smith D, Johansen C, Moran R, Doggett S, Sly A, Hobby M, Kurucz N, Wright P *et al*: Arboviral diseases and malaria in Australia, 2010-11: Annual report of the National Arbovirus and Malaria Advisory Committee. *Commun Dis Intell Q Rep* 2013, 37(1):E1-E20.
29. Cha GW, Cho JE, Lee EJ, Ju YR, Han MG, Park C, Jeong YE: Travel-associated chikungunya cases in South Korea during 2009-2010. *Osong public health and research perspectives* 2013, 4(3):170-175.
30. Dupont-Rouzeyrol M, Caro V, Guillaumot L, Vazeille M, D'Ortenzio E, Thiberge JM, Baroux N, Gourinat AC, Grandadam M, Failloux AB: Chikungunya virus and the mosquito vector *Aedes aegypti* in New Caledonia (South Pacific Region). *Vector Borne Zoonotic Dis* 2012, 12(12):1036-1041.
31. Chaves T, Pellini A, Mascheretti M, Jahnel M, Ribeiro A, Rodrigues S, Vasconcelos P, Boulos M: Travelers as sentinels for chikungunya fever, Brazil. *Emerging infectious diseases* 2012, 18(3):529-530.
32. Albuquerque IG, Marandino R, Mendonca AP, Nogueira RM, Vasconcelos PF, Guerra LR, Brandao BC, Aguiar GR, Bacco PA: Chikungunya virus infection: report of the first case diagnosed in Rio de Janeiro, Brazil. *Revista da Sociedade Brasileira de Medicina Tropical* 2012, 45(1):128-129.
33. Wright P, Fitzsimmons GJ, Johansen CA, Whelan PI, Co NAMA: Arboviral diseases and malaria in Australia, 2009-10: Annual report of the National Arbovirus and Malaria Advisory Committee. *Commun Dis Intell Q Rep* 2012, 36(1):70-81.
34. Mizuno Y, Kato Y, Takeshita N, Ujiie M, Kobayashi T, Kanagawa S, Kudo K, Lim CK, Takasaki T: Clinical and radiological features of imported chikungunya fever in Japan: A study of six cases at the National Center for Global Health and Medicine. *Journal of infection and chemotherapy : official journal of the Japan Society of Chemotherapy* 2011, 17(3):419-423.
35. Kobashi K, Kobayashi T, Nakamura-Uchiyama F, Ohnishi K: [A Japanese patient with chikungunya fever returning from Flores Island, Indonesia]. *Kansenshogaku Zasshi* 2010, 84(4):457-459.
36. Fitzsimmons GJ, Wright P, Johansen CA, Whelan PI, Arbovirus N: Arboviral diseases and malaria in Australia, 2008-09: Annual report of the National Arbovirus and Malaria Advisory Committee. *Commun Dis Intell Q Rep* 2010, 34(3):225-240.
37. Fitzsimmons GJ, Wright P, Johansen CA, Whelan PI, Ad NAM: Arboviral diseases and malaria in Australia, 2007/08: Annual report of the National Arbovirus and Malaria Advisory Committee. *Commun Dis Intell Q Rep* 2009, 33(2):155-169.
38. Panning M, Grywna K, van Esbroeck M, Emmerich P, Drosten C: Chikungunya fever in travelers returning to Europe from the Indian Ocean region, 2006. *Emerging infectious diseases* 2008, 14(3):416-422.
39. Harnett GB, Bucens MR: Isolation of chikungunya virus in Australia. *The Medical journal of Australia* 1990, 152(6):328-329.
